# Supplementary material for: Air pollution walk as an impact education tool for air quality sensitization in the global south
Source: Copernicus journal article supplement (doi:10.5194/gc-2023-3), 2023-10-27
Supplement: Supplementary file 1 [file gc-2023-3-supplement.pdf]

**Supplementary information**

**Air pollution walk as an impact education tool for air quality sensitization  
in the global south**

**Debabrata Bej<sup>1</sup>, Sandip Sankar Ghosh<sup>2</sup> and Arindam Roy\*<sup>2,3</sup>**

<sup>1</sup>Department of Electronics and Communication Engineering, National Institute of Technology (NIT) Durgapur, Durgapur 713209, West Bengal, India

<sup>2</sup>The Climate Thinker, Kolkata, India

<sup>3</sup>Laboratory of atmospheric processes and their impacts, École polytechnique fédérale de Lausanne, Switzerland

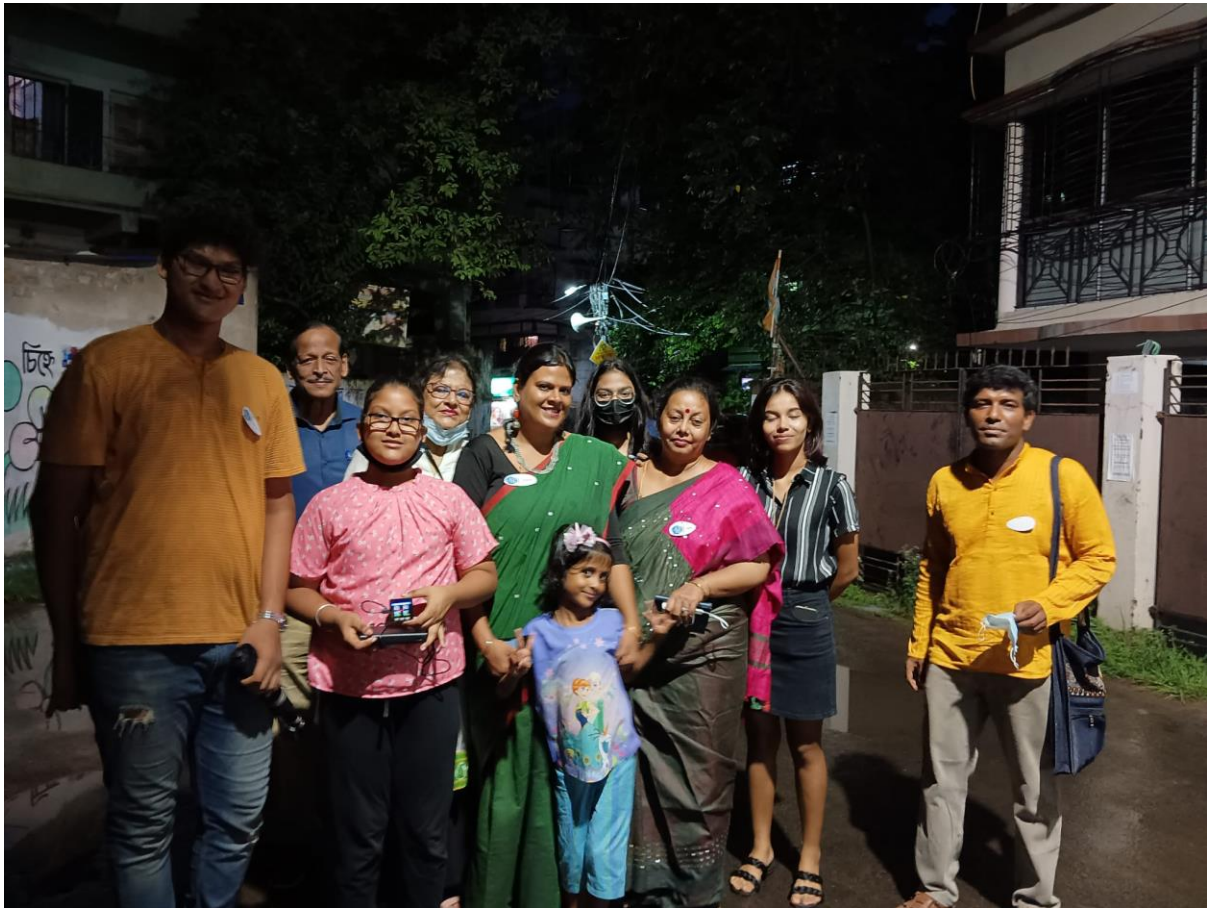

Fig S1: Picture of pollution walk conducted during this study

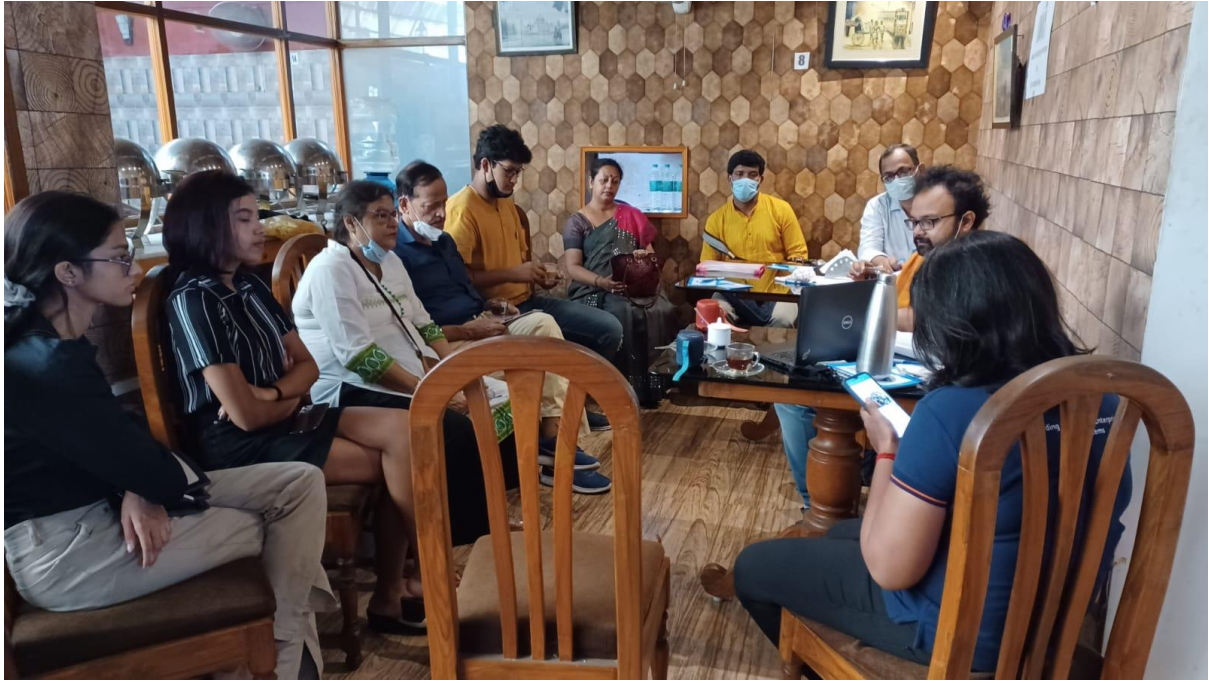

Fig S2: Focus group discussion after the pollution walk
